# Supplementary material
Source: PubMed Central journal article supplement (PMC2818644)
Supplement: NIHMS163869-supplement-1_si_001.pdf [file NIHMS163869-supplement-1_si_001.pdf]

**Supporting Information for**

**“Quantification of  $N^2$ -Carboxymethyl-2'-deoxyguanosine in Calf-thymus DNA and Human Kidney Cells by Capillary LC Tandem Mass Spectrometry Coupled with Stable Isotope-dilution Method”**

by

Hongxia Wang, Huachuan Cao and Yinsheng Wang

Department of Chemistry, University of California, Riverside, California 92521-0403

*Chem. Res. Toxicol.* (TX-2009-00286C)

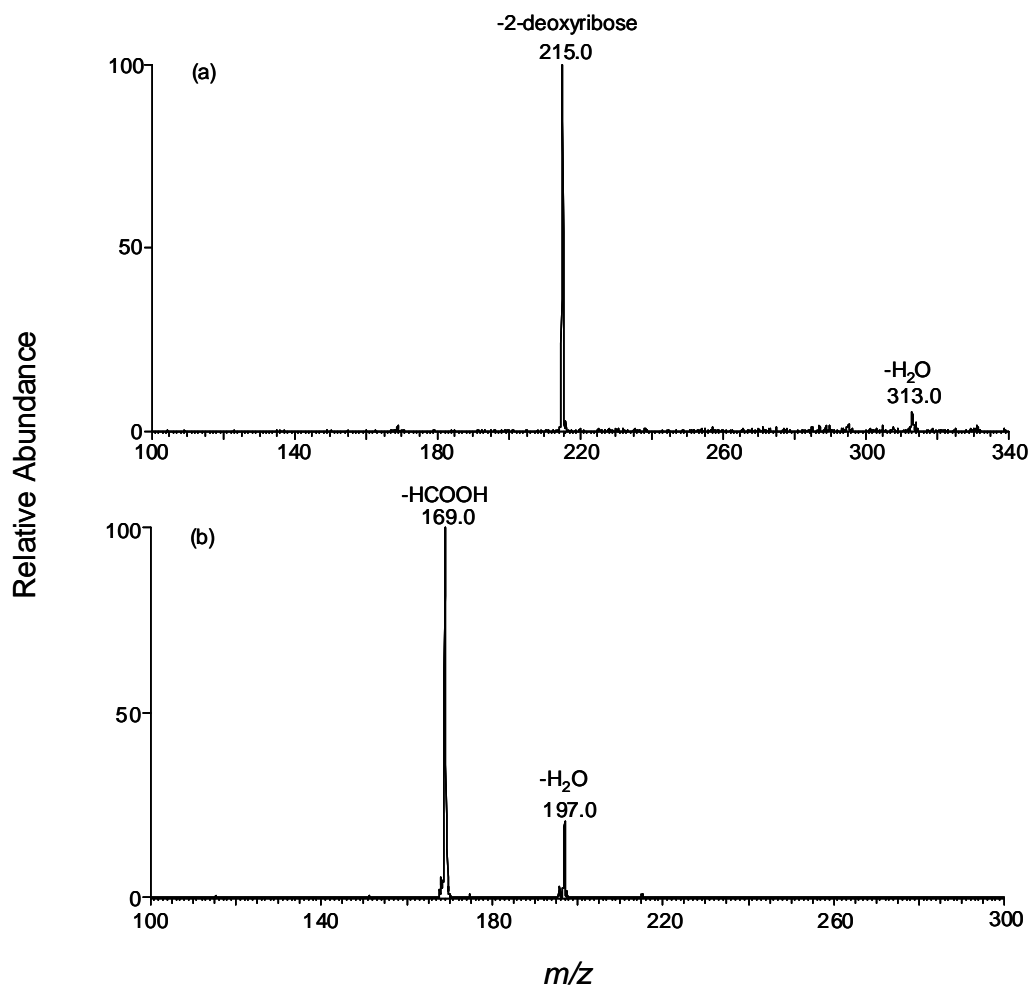

**Figure S1.** ESI-MS/MS (a) spectrum of the  $[M+H]^+$  ion and MS<sup>3</sup> (b) spectrum of the ion of  $m/z$  215.0 observed in MS/MS of synthetic  $[U-^{15}N_5]-N^2$ -CMdG.

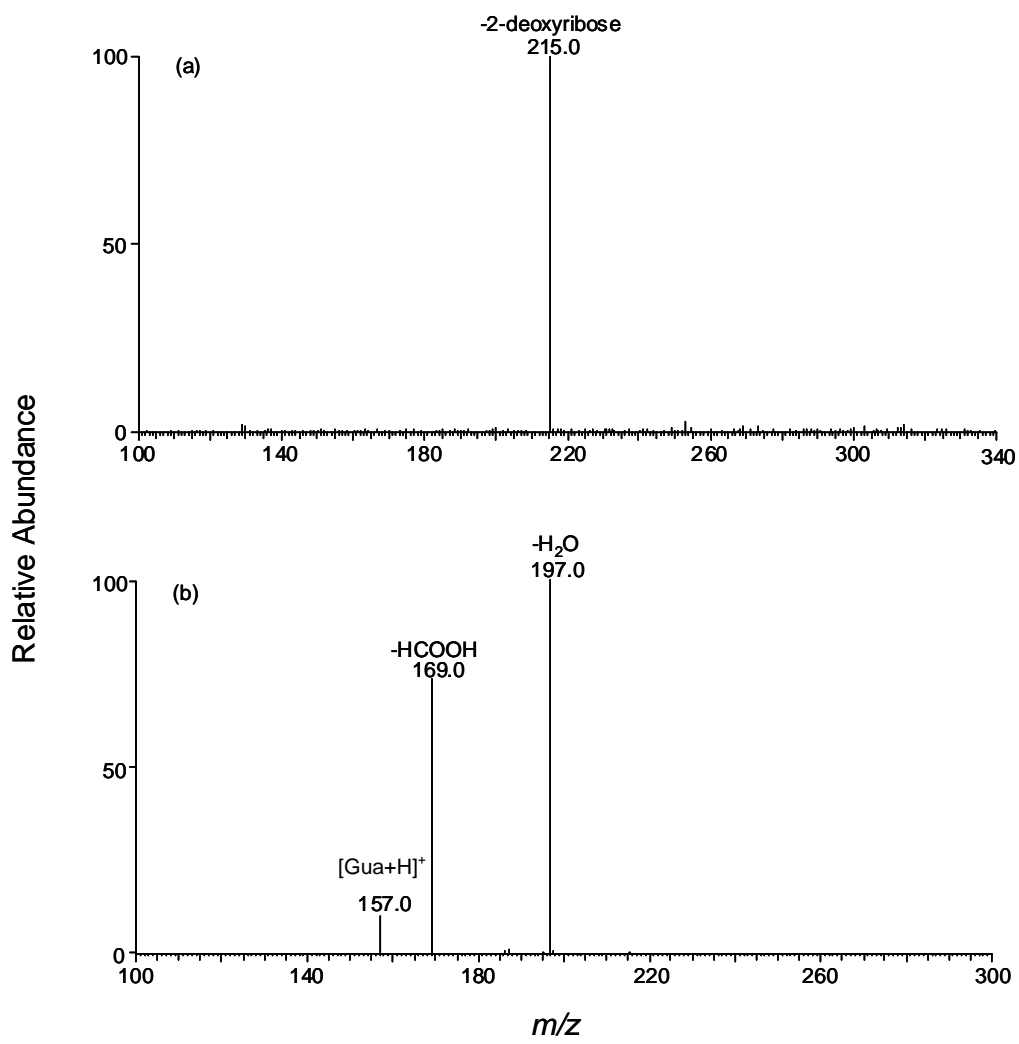

**Figure S2.** ESI-MS/MS of the  $[M+H]^+$  ion of  $[U-^{15}N_5]$ -1, $N^2$ -glyoxal-dG (a), and shown in (b) is the MS<sup>3</sup> of the ion of  $m/z$  215.0 found in (a).

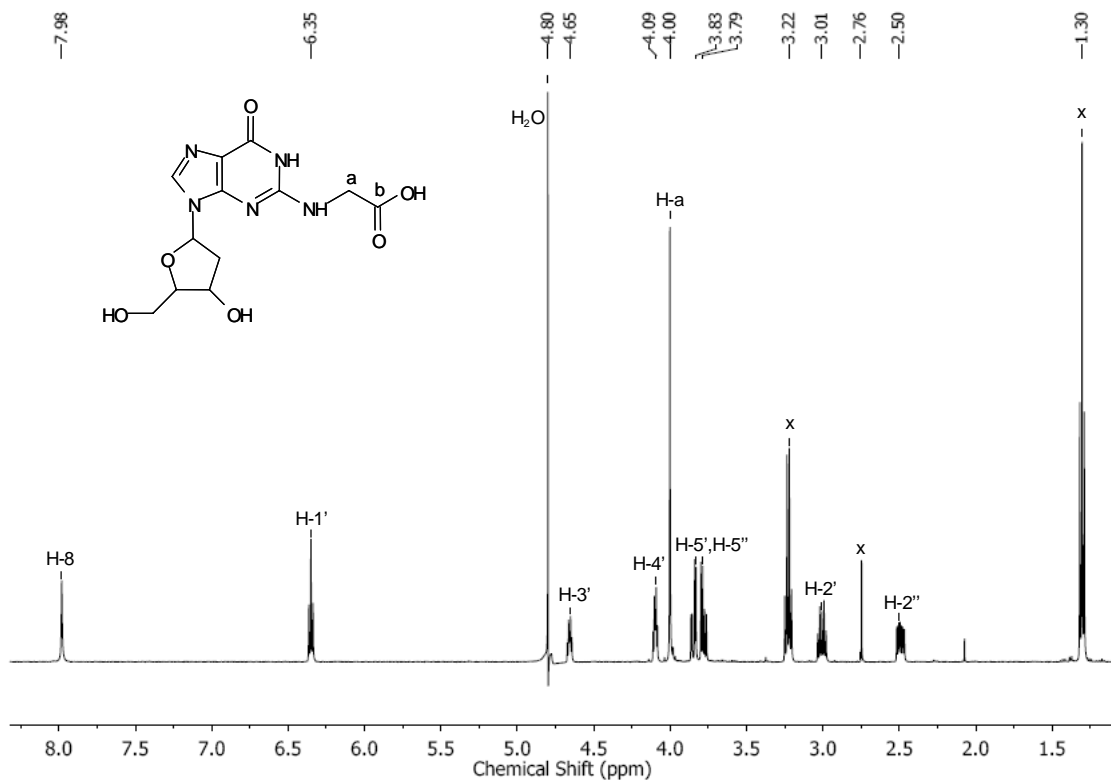

**Figure S3.** <sup>1</sup>H-NMR spectrum of standard *N*<sup>2</sup>-CMdG (500 MHz, D<sub>2</sub>O, 25 °C): δ 7.98 (s, 1H, H-8), 6.35 (t, 1H, H-1'), 4.65 (m, 1H, H-3'), 4.09 (m, 1H, H-4'), 4.00 (s, 2H, CH<sub>2</sub>), 3.83 (m, 1H, H-5'), 3.79 (m, 1H, H-5''), 3.01 (m, 1H, H-2'), 2.50 (m, 1H, H-2''). “H-a” represents the carboxymethyl proton, and peaks marked with ‘x’ are from impurities.

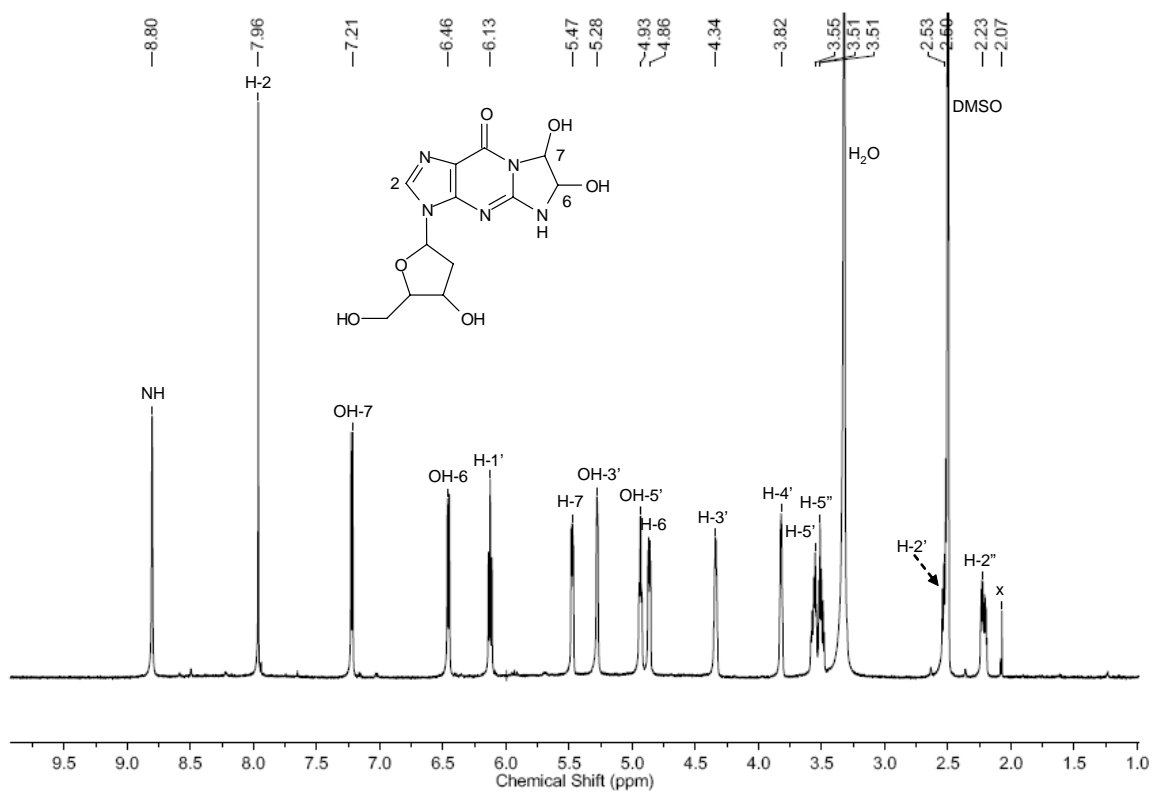

**Figure S4.**  $^1\text{H}$ -NMR spectrum of standard 1, $N^2$ -glyoxal-dG (600 MHz, DMSO, 25 °C):  $\delta$  8.80 (s, 1H, NH), 7.96 (s, 1H, H-2), 7.21 (d, 1H, OH-7), 6.46 (d, 1H, OH-6), 6.13 (m, 1H H-1'), 5.47 (m, 1H, H-7), 5.28 (d, 1H, OH-3'), 4.93 (t, 1H, OH-5'), 4.86 (m, 1H, H-6), 4.34 (m, 1H, H-3'), 3.82 (m, 1H, H-4'), 3.55 (m, 1H, H-5'), 3.51 (m, 1H, H-5''), 2.53 (m, 1H, H-2'), 2.23 (m, 1H, H-2''). The peak marked with 'x' is from impurities.

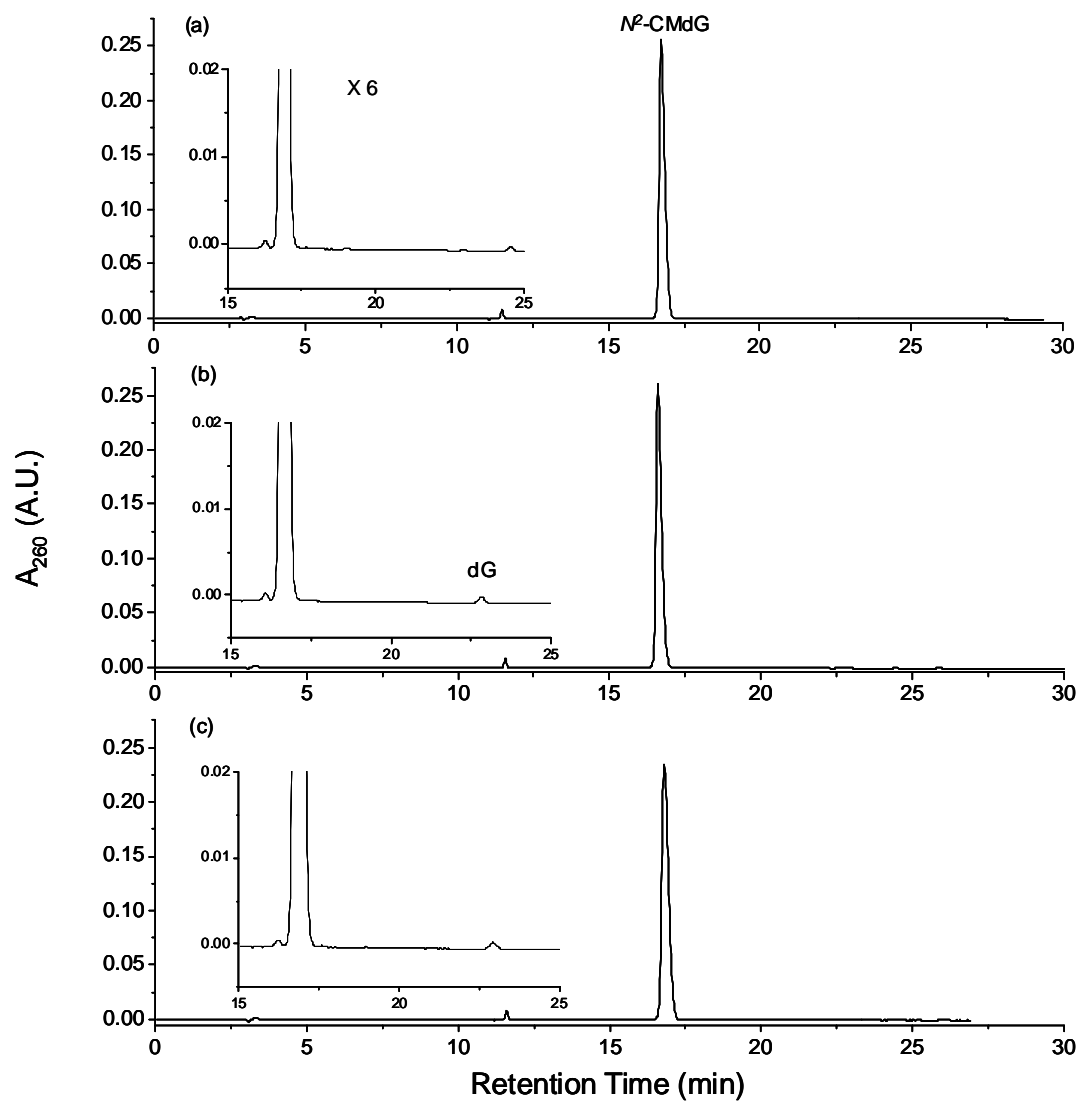

**Figure S5.** HPLC traces for the separation of aliquots removed from the  $N^2$ -CMdG solution after incubation at 37 °C in PBS buffer for 0 (a), 2 (b) and 7 (c) days, respectively. Shown in the insets are the expanded chromatograms to visualize better the dG peak.

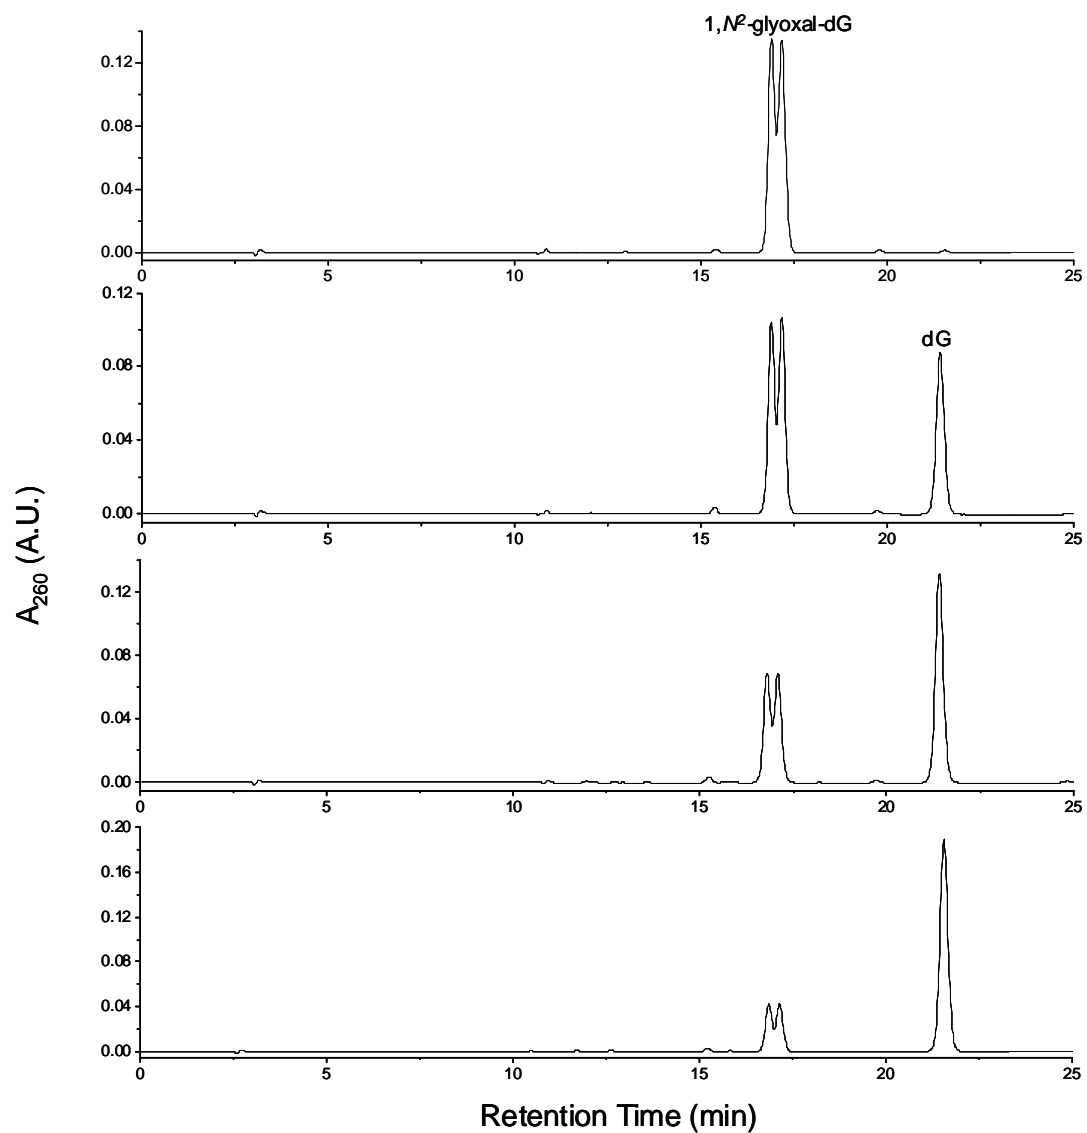

**Figure S6.** HPLC traces for the separation of aliquots removed from the 1,N<sup>2</sup>-glyoxal-dG solution after incubation at 37 °C in PBS buffer for 0 hr (a), 4 hr (b), 8 hr (c) and 2 days (d), respectively. The doublet peaks with the retention time at 16.9 and 17.1 min correspond to the two diastereomers of 1,N<sup>2</sup>-glyoxal-dG.

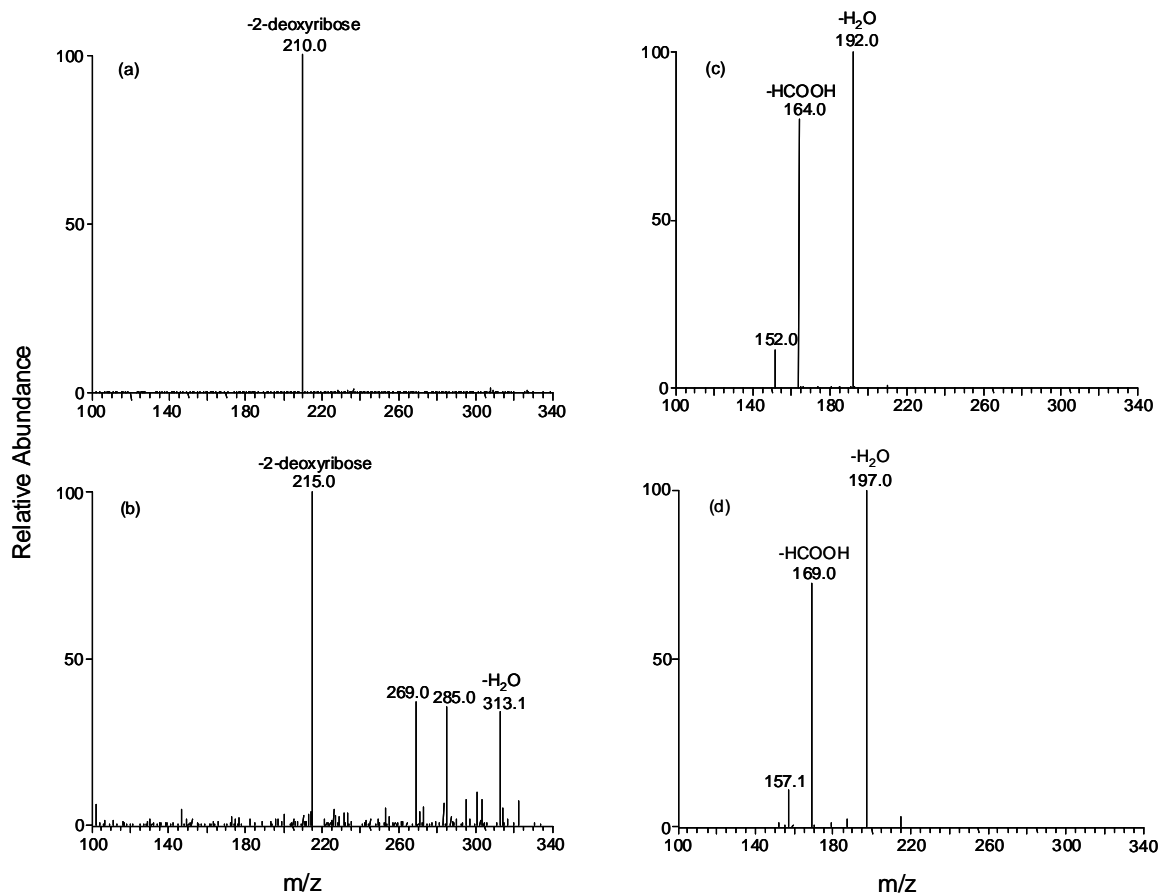

**Figure S7.** Product-ion spectra of the ion  $m/z$  326 (a),  $m/z$  331 (b) and MS<sup>3</sup> spectra of  $m/z$  210 (c),  $m/z$  215 (d). Panels (a) and (c) are for unlabeled, and (b) and (d) are for the [U-<sup>15</sup>N<sub>5</sub>]-1,*N*<sup>2</sup>-glyoxal-dG in the digestion mixture of calf thymus DNA treated with 250 μM of glyoxal.



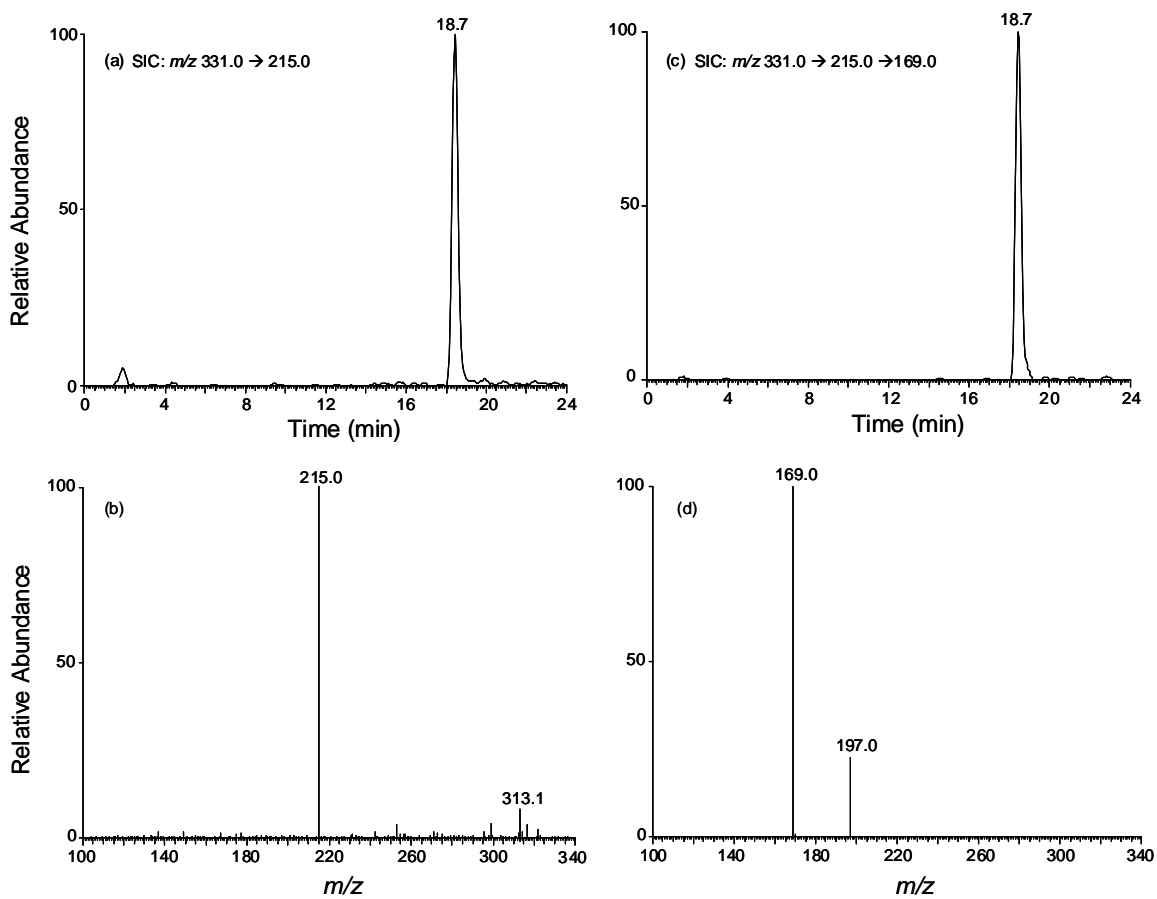

**Figure S8.** Selected-ion chromatograms (SICs) for monitoring  $m/z$  331  $\rightarrow$  215 (a) and  $m/z$  331  $\rightarrow$  215  $\rightarrow$  169 (c) transitions for [U- $^{15}\text{N}_5$ ]- $\text{N}^2$ -CMdG, and the product-ion spectra of the ion of  $m/z$  331 (b) and MS<sup>3</sup> spectra of the ion of  $m/z$  215 (d).

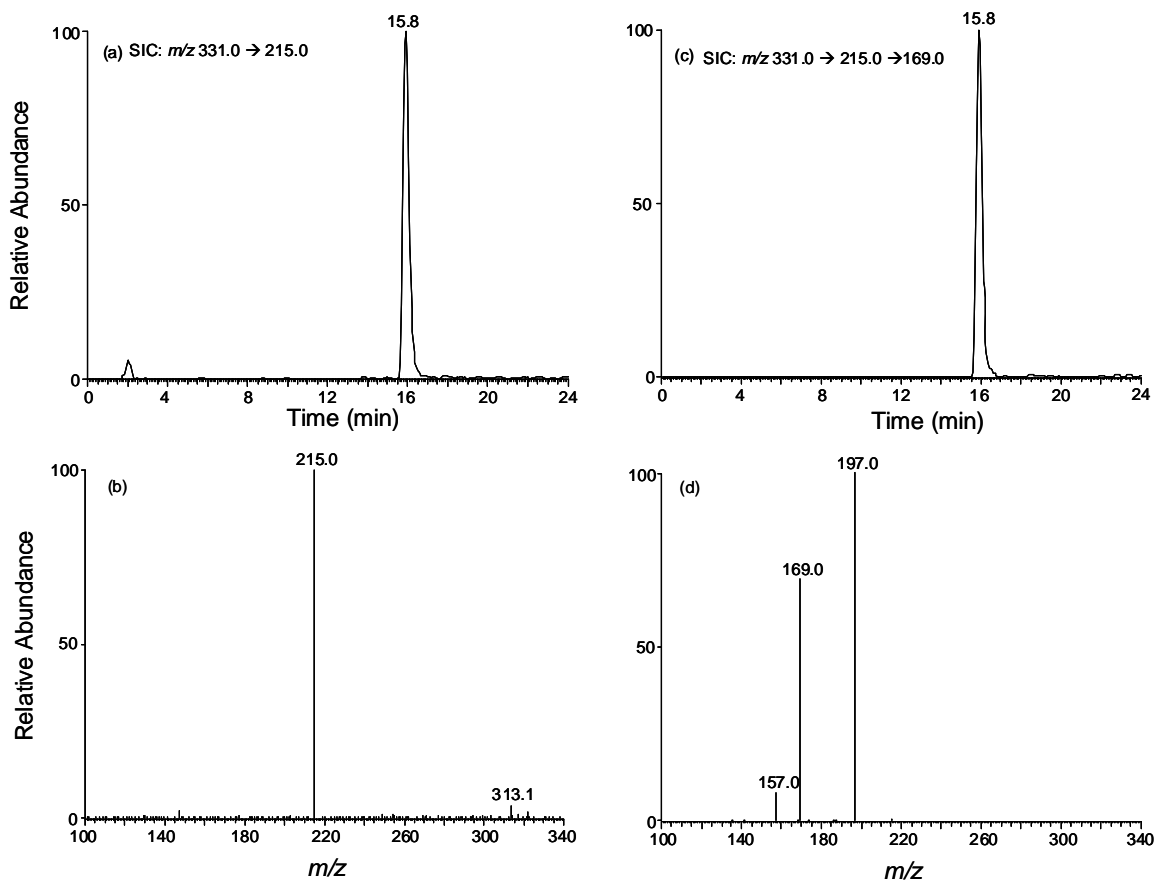

**Figure S9.** Selected-ion chromatograms (SICs) for monitoring the  $m/z$  331  $\rightarrow$  215 (a) and  $m/z$  331  $\rightarrow$  215  $\rightarrow$  169 (c) transitions for [U- $^{15}\text{N}_5$ ]-1, $N^2$ -glyoxal-dG and the product-ion spectra of the ion of  $m/z$  331 (b) and MS<sup>3</sup> spectra of the ion of  $m/z$  215 (d).

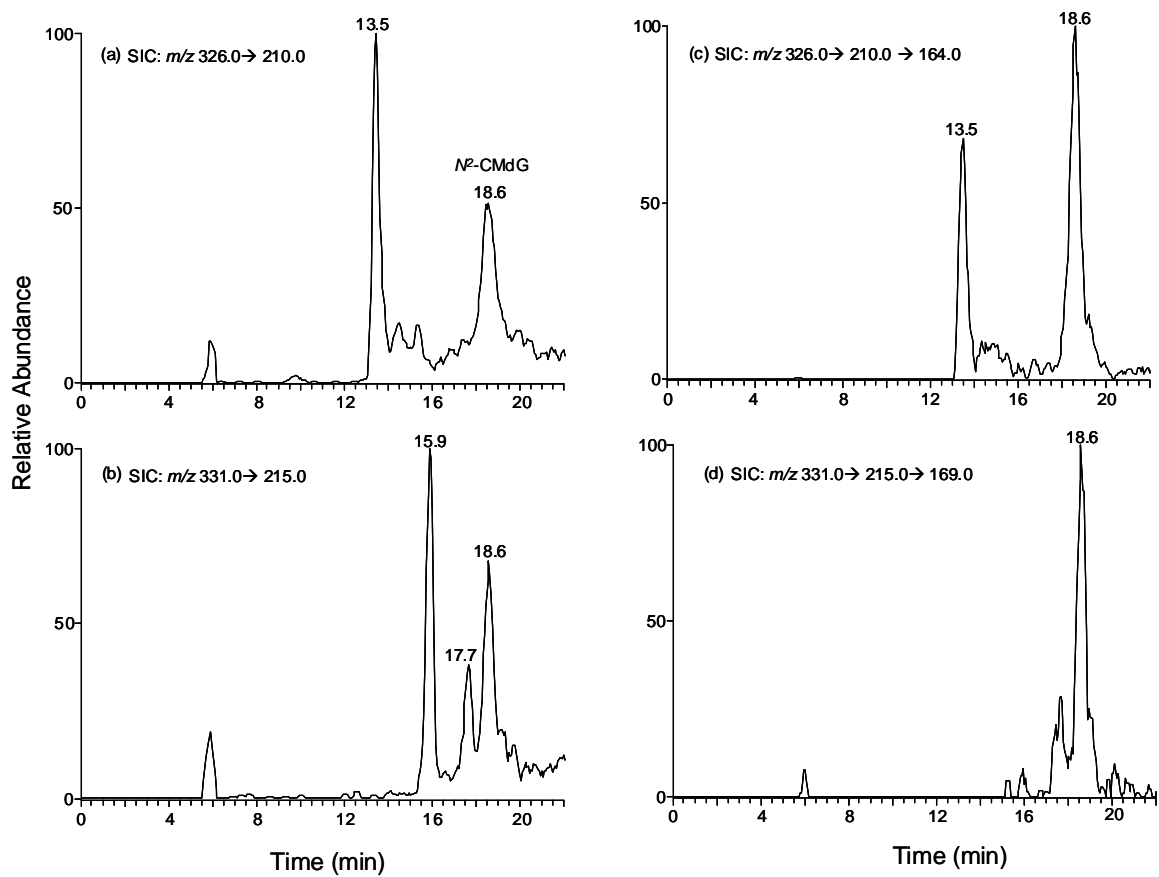

**Figure S10.** Selected-ion chromatograms for monitoring the  $m/z$  326  $\rightarrow$  210 (a) and  $m/z$  326  $\rightarrow$  210  $\rightarrow$  164 (c) (for unlabeled  $N^2$ -CMdG),  $m/z$  331  $\rightarrow$  215 (b) and  $m/z$  331  $\rightarrow$  215  $\rightarrow$  169 (d) (for [ $U$ - $^{15}N_5$ ]- $N^2$ -CMdG) transitions of the digestion mixtures of the nuclear DNA extracted from 293T cells, which were treated with 50  $\mu$ M of glyoxal.

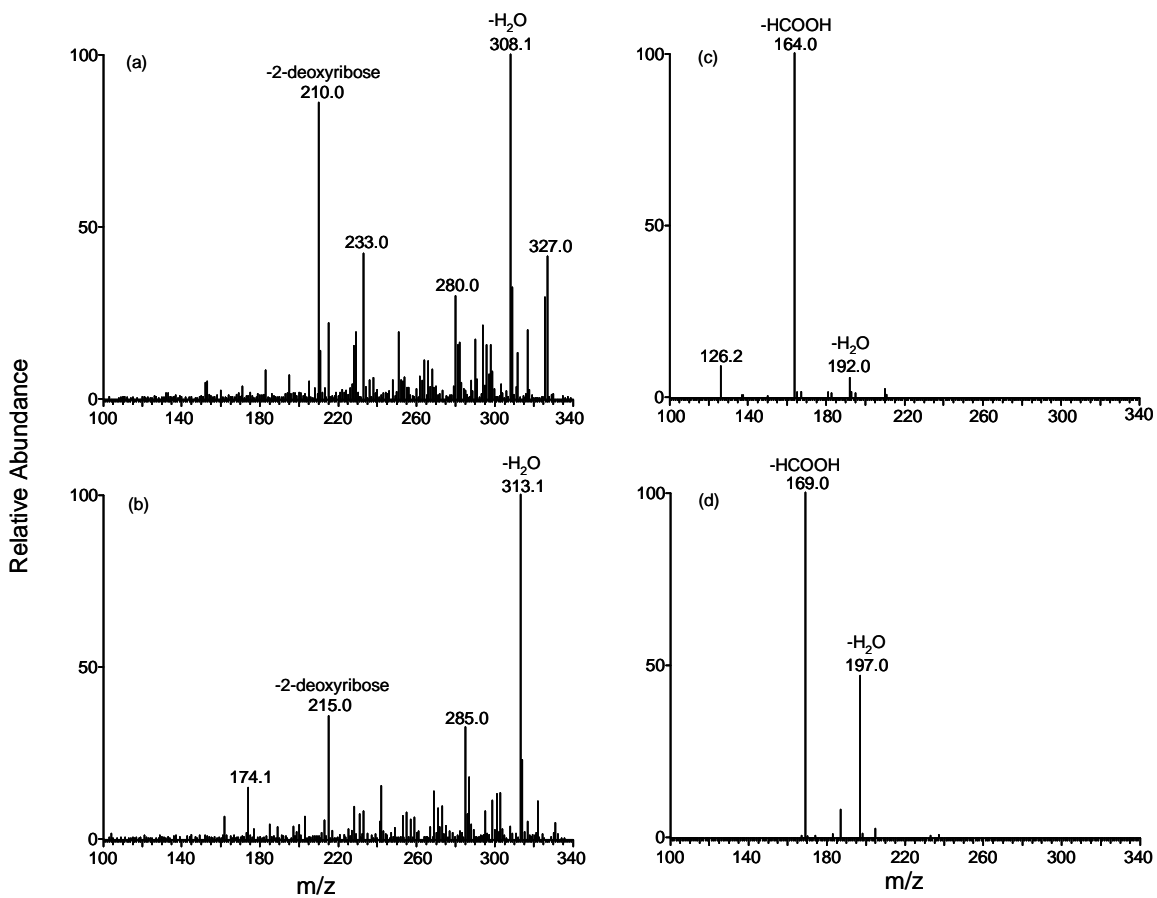

**Figure S11.** Product-ion spectra of the ion  $m/z$  326 (a),  $m/z$  331 (b) and MS<sup>3</sup> spectra of  $m/z$  210 (c),  $m/z$  215 (d). Panels (a) and (c) are for unlabeled, and (b) and (d) are for  $[U-^{15}N_5]$ -N<sup>2</sup>-CMdG in the nuclear DNA from 293T cells, respectively.

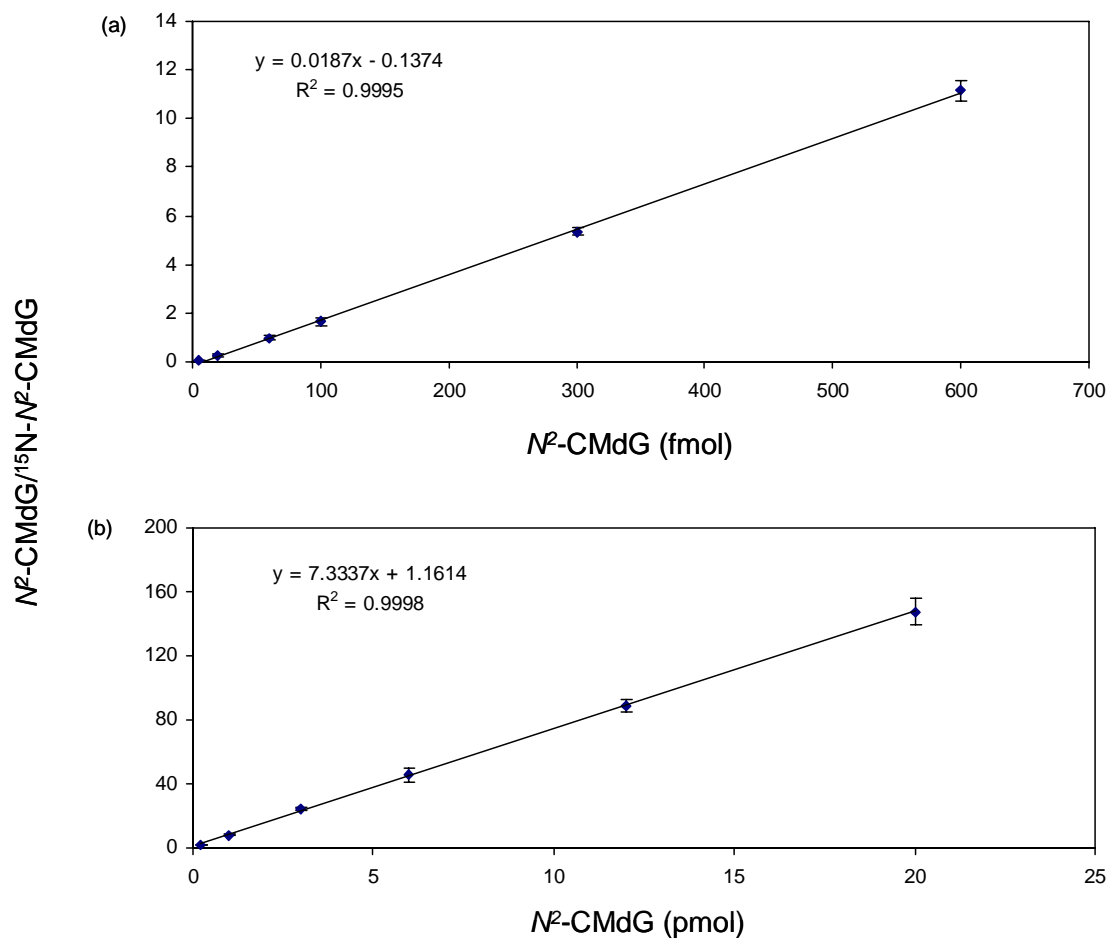

**Figure S12.** Calibration curves for the quantification of  $N^2$ -CMdG. The amounts of  $[U\text{-}^{15}\text{N}_5]\text{-}N^2\text{-CMdG}$  were 55 fmol (a) and 100 fmol (b), respectively.
